# Supplementary material for: Effect of Irradiation on Structural Changes of Levan
Source: MDPI journal article supplement (doi:10.3390/ijms23052463), 2022-02-23
Supplement: s1 [file s1]

# Effect of Irradiation on Structural Changes of Levan

## Supplementary Materials

Dorota Chełminiak-Dudkiewicz \*, Aleksander Smolarkiewicz-Wyczachowski, Katarzyna Węgrzynowska-Drzymalska and Marta Ziegler-Borowska \*

Department of Biomedical Chemistry and Polymer Science, Medicinal Chemistry Research Group, Faculty of Chemistry Nicolaus Copernicus University in Torun, Gagarina 7, 87-100 Torun, Poland

\* Correspondence: MZB; martaz@umk.pl, DChD: dorotachd@umk.pl

a)

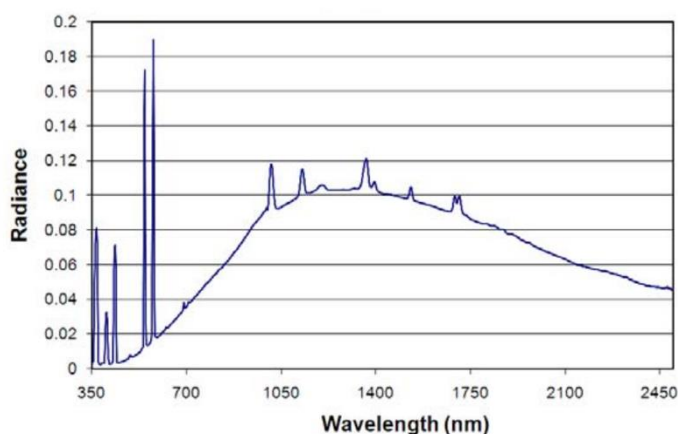

b)

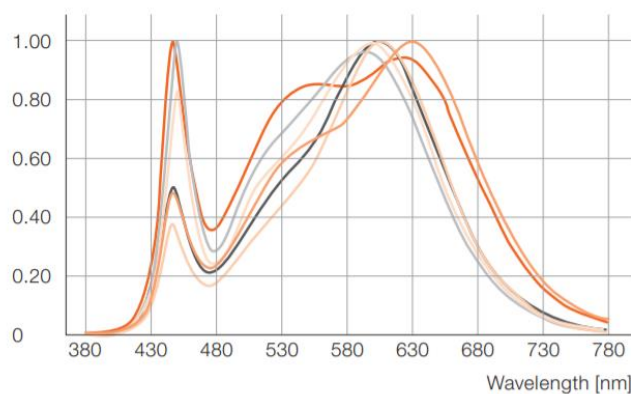

**Figure S1.** Spectrum of the (a) polichromatic [1] and (b) LED lamps [2].

## References

- [1]. Elvidge, C.D.; Keith, D.M.; Tuttle, B.T.; Baugh, K.E. Spectral Identification of Lighting Type and Character. *Sensors* **2010**, *10*, 3961–3988. <https://doi.org/10.3390/s100403961>.
- [2]. Technical Application Guide. PrevaLED® Core Z6 LED Modules. Available online: [www.osram.com/prevaled-core](http://www.osram.com/prevaled-core) (access on 16 July 2020).
